# Supplementary material for: Regulation of lipid metabolism by APOE4 in intrahepatic cholangiocarcinoma via the enhancement of ABCA1 membrane expression
Source: PeerJ. 2024 Jan 22;12:e16740. doi: 10.7717/peerj.16740 (PMC10809977; doi:10.7717/peerj.16740)
Supplement: Supplemental Information 3 [file peerj-12-16740-s003.xlsx]

## Sheet: Sheet1
Figure 5
		LDL-C	1	2	3	AVE	SD
	CCLP1	Over-NC	0.964659	1.19416	0.935728	1.03152	0.115612
		Over-APOE4	0.640941	0.43516	0.507185	0.527762	0.0852604
		LDL-C	1	2	3	AVE	SD
	HuCCT1	Over-NC	1.17603	0.971679	0.967949	1.03855	0.0972231
		Over-APOE4	0.594843	0.505822	0.494841	0.531835	0.0447781
		TG	1	2	3	AVE	SD
	CCLP1	Over-NC	1.04554	0.943599	1.18852	1.05922	0.100454
		Over-APOE4	0.44454	0.63016	0.46793	0.51421	0.0825432
		TG	1	2	3	AVE	SD
	HuCCT1	Over-NC	0.97535	1.22911	1.04822	1.08423	0.10668
		Over-APOE4	0.67251	0.58703	0.524424	0.594655	0.0606958
		TC	1	2	3	AVE	SD
	HuCCT1	Over-NC	0.692274	0.638897	0.523287	0.618153	0.0705308
		Over-APOE4	0.96047	0.918891	0.745644	0.875002	0.0930314
		TC	1	2	3	AVE	SD
		Over-NC	0.597009	0.48854	0.50084	0.528796	0.0484943
	CCLP1	Over-APOE4	0.852418	0.87136	0.921967	0.881915	0.0293578
		HDL-C	1	2	3	AVE	SD
	CCLP1	Over-NC	1.68815	1.78031	1.6258	1.69809	0.0634682
		Over-APOE4	0.938721	0.840298	0.884279	0.887766	0.0402564
		HDL-C	1	2	3	AVE	SD
	HuCCT1	Over-NC	1.85401	1.78558	1.83584	1.82514	0.0289421
		Over-APOE4	0.932577	0.89462	0.904956	0.910718	0.0160224
Figure 6
		TG	1	2	3	AVE	SD
	CCLP1	NC	0.915418	0.958593	0.93674	0.936917	0.0176266
		Over-APOE4	0.49423	0.404491	0.46731	0.455344	0.0376002
		Over-APOE4+si-NC	0.50759	0.481513	0.472829	0.487311	0.0147714
		Over-APOE4+si-ABCA1	0.785064	0.827866	0.80487	0.805933	0.0174901
	HuCCT1	TG	1	2	3	AVE	SD
		NC	0.982607	0.941415	0.93584	0.953287	0.0208569
		Over-APOE4	0.475591	0.506585	0.478563	0.486913	0.0139632
		Over-APOE4+si-NC	0.535864	0.52092	0.486513	0.514432	0.0206627
		Over-APOE4+si-ABCA1	0.861925	0.804888	0.773862	0.813558	0.0364704
	CCLP1	LDC-C	1	2	3	AVE	SD
		NC	0.890376	0.828104	0.847282	0.855254	0.0260399
		Over-APOE4	0.472669	0.401891	0.527139	0.467233	0.0512766
		Over-APOE4+si-NC	0.476673	0.511264	0.527862	0.505266	0.0213238
		Over-APOE4+si-ABCA1	0.76054	0.703835	0.795991	0.753455	0.0379547
	HuCCT1	LDC-C	1	2	3	AVE	SD
		NC	0.847023	0.89941	0.876362	0.874265	0.0214383
		Over-APOE4	0.486862	0.429941	0.408514	0.441772	0.0330614
		Over-APOE4+si-NC	0.45228	0.49941	0.528823	0.493504	0.0315263
		Over-APOE4+si-ABCA1	0.722905	0.79941	0.826628	0.782981	0.0439094
	CCLP1	HDL-C	1	2	3	AVE	SD
		NC	0.426264	0.474174	0.495994	0.465477	0.0291238
		Over-APOE4	0.821654	0.802158	0.830607	0.81814	0.0118771
		Over-APOE4+si-NC	0.80524	0.78068	0.815131	0.80035	0.0144833
		Over-APOE4+si-ABCA1	0.528188	0.559907	0.521634	0.536576	0.0167128
	HuCCT1	HDL-C	1	2	3	AVE	SD
		NC	0.470116	0.527216	0.41259	0.469974	0.0467959
		Over-APOE4	0.928085	0.8833	0.908449	0.906611	0.0183295
		Over-APOE4+si-NC	0.88297	0.89748	0.821896	0.867449	0.0327508
		Over-APOE4+si-ABCA1	0.574265	0.525161	0.601926	0.567117	0.0317441
		TC	1	2	3	AVE	SD
	CCLP1	NC	1.39806	1.22775	1.29235	1.30605	0.0702007
		Over-APOE4	0.58585	0.51748	0.54764	0.550323	0.0279764
		Over-APOE4+si-NC	0.584567	0.536729	0.511712	0.544336	0.0302254
		Over-APOE4+si-ABCA1	0.798569	0.82701	0.850324	0.825301	0.0211634
		TC	1	2	3	AVE	SD
	HuCCT1	NC	1.17835	1.2953	1.15343	1.20903	0.0618468
		Over-APOE4	0.436717	0.51483	0.48048	0.477342	0.0319666
		Over-APOE4+si-NC	0.53109	0.504424	0.53721	0.524241	0.014234
		Over-APOE4+si-ABCA1	0.892872	0.832958	0.783102	0.836311	0.0448762
