# Supplementary material for: Regulation of lipid metabolism by APOE4 in intrahepatic cholangiocarcinoma via the enhancement of ABCA1 membrane expression
Source: PeerJ. 2024 Jan 22;12:e16740. doi: 10.7717/peerj.16740 (PMC10809977; doi:10.7717/peerj.16740)
Supplement: Supplemental Information 4 — Raw data of cell proliferation activity detected by CCK-8 after APOE4 overexpression. [file peerj-12-16740-s004.xlsx]

## Sheet: Sheet1
	CCLP1		1	2	3	AVG	SD	1	2	3	AVG	SD	1	2	3	AVG	SD	1	2	3	AVG	SD	1	2	3	AVG	SD
		Over-NC	0.058	0.114	0.128	0.1	0.0370405	0.236251	0.289689	0.317814	0.281251	0.0414309	0.466248	0.522607	0.548225	0.51236	0.0419385	0.775729	0.844241	0.766889	0.79562	0.0423386	1.31079	1.00354	1.39544	1.23659	0.206218
		Over-APOE4	0.075	0.083	0.142	0.1	0.0365923	0.137048	0.194648	0.264165	0.19862	0.0636514	0.260542	0.294259	0.364759	0.30652	0.0531792	0.47451	0.472885	0.515136	0.48751	0.0239382	0.501787	0.520502	0.556761	0.52635	0.0279499
			0h					24h					48h					72h					96h
		Over-NC	0.1591	0.1624	0.1877	450	/	0.307451	0.357989	0.379614	450	/	0.563448	0.604507	0.591725	450	/	0.82873	0.932541	0.859989	450	/	1.36649	1.07134	1.47664	450	/
			0.1011	0.0484	0.0597	630	/	0.0712	0.0683	0.0618	630	/	0.0972	0.0819	0.0435	630	/	0.053	0.0883	0.0931	630	/	0.0557	0.0678	0.0812	630	/
		Over-APOE4	0.1533	0.1472	0.1978	450	/	0.217448	0.282548	0.351765	450	/	0.306942	0.360759	0.415059	450	/	0.52191	0.526985	0.608036	450	/	0.565587	0.604702	0.654161	450	/
			0.0783	0.0642	0.0558	630	/	0.0804	0.0879	0.0876	630	/	0.0464	0.0665	0.0503	630	/	0.0474	0.0541	0.0929	630	/	0.0638	0.0842	0.0974	630	/
	HuCCT1		1	2	3	AVG	SD	1	2	3	AVG	SD	1	2	3	AVG	SD	1	2	3	AVG	SD	1	2	3	AVG	SD
		Over-NC	0.089	0.101	0.11	0.1	0.0105357	0.198659	0.297988	0.267426	0.254691	0.0508745	0.476495	0.553349	0.507236	0.51236	0.0386823	0.709982	0.854244	0.789304	0.78451	0.0722507	1.01426	0.824159	1.01866	0.952361	0.111048
		Over-APOE4	0.077	0.088	0.135	0.1	0.0308058	0.148204	0.218988	0.296408	0.2212	0.0741268	0.266218	0.323506	0.421231	0.336985	0.0783807	0.471333	0.456755	0.529642	0.48591	0.0385679	0.574796	0.585441	0.636001	0.598746	0.0327001
			0h					24h					48h					72h					96h
		Over-NC	0.1757	0.1465	0.1844	450	/	0.281059	0.345888	0.336426	450	/	0.527995	0.633449	0.584636	450	/	0.762382	0.951044	0.884704	450	/	1.05816	0.896459	1.09756	450	/
			0.0867	0.0455	0.0744	630	/	0.0824	0.0479	0.069	630	/	0.0515	0.0801	0.0774	630	/	0.0524	0.0968	0.0954	630	/	0.0439	0.0723	0.0789	630	/
		Over-APOE4	0.1249	0.1313	0.1781	450	/	0.200304	0.284988	0.366008	450	/	0.353318	0.385206	0.468331	450	/	0.564233	0.554355	0.573842	450	/	0.655396	0.681041	0.714801	450	/
			0.0479	0.0433	0.0431	630	/	0.0521	0.066	0.0696	630	/	0.0871	0.0617	0.0471	630	/	0.0929	0.0976	0.0442	630	/	0.0806	0.0956	0.0788	630	/
