# Supplementary material for: Regulation of lipid metabolism by APOE4 in intrahepatic cholangiocarcinoma via the enhancement of ABCA1 membrane expression
Source: PeerJ. 2024 Jan 22;12:e16740. doi: 10.7717/peerj.16740 (PMC10809977; doi:10.7717/peerj.16740)
Supplement: Supplemental Information 6 [file peerj-12-16740-s006.xlsx]

## Sheet: Sheet1
Figure 4A
		GAPDH				APOE4			△Ct	△△Ct	2-△△Ct
		NC	18.01				22.12
			17.98				22.31
			18.01	18			22.53	22.32	4.32	0	1
		Over-APOE4	18.16				24.56
			18.21				23.96
			18.04	18.1367			23.92	24.1467	6.01	1.69	0.309927
		NC	18.01				22.12
			18.05				22.45
			18.01	18.0233			22.53	22.3667	4.34333	0	1
		Over-APOE4	18.16				23.56
			18.21				23.85
			18.04	18.1367			23.92	23.7767	5.64	1.29667	0.407066
		NC	18.01				22.12
			18.98				22.31
			18.21	18.4			22.55	22.3267	3.92667	0	1
		Over-APOE4	18.16				24.76
			18.21				23.96
			18.04	18.1367			23.92	24.2133	6.07667	2.15	0.225313
Figure 4B		CCLP1
		GAPDH				APOE4			△Ct	△△Ct	2-△△Ct
		Over-NC	18.01				22.12
			17.98				22.31
			18.01	18			22.53	22.32	4.32	0	1
		Over-APOE4	19.51				23.21
			19.75				23.42
			19.76	19.6733			23.33	23.32	3.64667	-0.673333	1.59475
			HuCCT1
		GAPDH				APOE4			△Ct	△△Ct	2-△△Ct
		Over-NC	18.01				22.12
			17.98				22.31
			18.01	18			22.53	22.32	4.32	0	1
		Over-APOE4	19.51				22.45
			19.75				23.63
			19.76	19.6733			23.73	23.27	3.59667	-0.723333	1.65099
Figure 5I		CCLP1
		GAPDH				APOE4			△Ct	△△Ct	2-△△Ct
		NC	18.01			FAS	22.12
			17.98				22.31
			18.01	18			22.53	22.32	4.32	0	1
		Over-APOE4	18.16				24.56
			18.21				23.96
			18.04	18.1367			23.92	24.1467	6.01	1.69	0.309927
		NC	18.01			ACC	22.12
			18.05				22.45
			18.01	18.0233			22.53	22.3667	4.34333	0	1
		Over-APOE4	18.16				23.56
			18.21				23.85
			18.04	18.1367			23.92	23.7767	5.64	1.29667	0.407066
		NC	18.01			SCD1	22.12
			18.98				22.31
			18.21	18.4			22.55	22.3267	3.92667	0	1
		Over-APOE4	18.16				24.76
			18.21				23.96
			18.04	18.1367			23.92	24.2133	6.07667	2.15	0.225313
Figure 5J		HuCCT1
		GAPDH				APOE4			△Ct	△△Ct	2-△△Ct
		NC	18.01			FAS	22.12
			17.98				22.31
			18.01	18			22.53	22.32	4.32	0	1
		Over-APOE4	18.16				24.66
			18.21				23.86
			18.04	18.1367			23.82	24.1133	5.97667	1.65667	0.317171
		NC	18.01			ACC	22.12
			18.05				22.45
			18.01	18.0233			22.53	22.3667	4.34333	0	1
		Over-APOE4	18.16				23.56
			18.51				23.75
			18.04	18.2367			23.82	23.71	5.47333	1.13	0.456916
		NC	18.01			SCD1	22.12
			18.98				22.31
			18.21	18.4			22.55	22.3267	3.92667	0	1
		Over-APOE4	18.16				24.76
			18.21				23.76
			18.04	18.1367			23.82	24.1133	5.97667	2.05	0.241484
Figure 5K		CCLP1
		NC	18.01			GPT-1	22.12
			17.98				22.31
			18.01	18			22.53	22.32	4.32	0	1
		Over-APOE4	18.16				24.52
			18.21				23.35
			18.04	18.1367			23.25	23.7067	5.57	1.25	0.420448
		NC	18.01			SREBP1	22.12
			18.05				22.45
			18.01	18.0233			22.53	22.3667	4.34333	0	1
		Over-APOE4	18.16				23.95
			18.21				23.85
			18.34	18.2367			24.92	24.24	6.00333	1.66	0.316439
		NC	18.01			PPARγ	22.12
			18.98				22.31
			18.21	18.4			22.55	22.3267	3.92667	0	1
		Over-APOE4	18.16				24.76
			18.21				23.93
			18.04	18.1367			23.92	24.2033	6.06667	2.14	0.22688
Figure 5L		HuCCT1
		GAPDH				APOE4			△Ct	△△Ct	2-△△Ct
		NC	18.01			GPT-1	22.12
			17.98				22.31
			18.01	18			22.53	22.32	4.32	0	1
		Over-APOE4	18.16				24.32
			18.21				23.25
			18.04	18.1367			23.35	23.64	5.50333	1.18333	0.440333
		NC	18.01			SREBP1	22.12
			18.05				22.45
			18.01	18.0233			22.53	22.3667	4.34333	0	1
		Over-APOE4	18.16				23.95
			18.21				23.75
			18.34	18.2367			24.62	24.1067	5.87	1.52667	0.347078
		NC	18.01			PPARγ	22.12
			18.98				22.31
			18.21	18.4			22.55	22.3267	3.92667	0	1
		Over-APOE4	18.16				24.76
			18.21				23.83
			18.04	18.1367			23.82	24.1367	6	2.07333	0.23761
Figure 6A
	CCLP1	GAPDH				ABCA1			△Ct	△△Ct	2-△△Ct
		Over-NC	18.23				23.53
			18.21				23.46
			18.16	18.2			23.53	23.5067	5.30667	0	1
		Over-APOE4	19.11				23.41
			19.15				23.37
			19.16	19.14			23.33	23.37	4.23	-1.07667	2.10916
	HuCCT1
		GAPDH				ABCA1			△Ct	△△Ct	2-△△Ct
		Over-NC	18.24				23.32
			18.28				23.41
			18.31	18.2767			23.37	23.3667	5.09	0	1
		Over-APOE4	19.21				23.11
			19.25				23.17
			19.26	19.24			23.19	23.1567	3.91667	-1.17333	2.25532
Figure 6D
	CCLP1	GAPDH				ABCA1			△Ct	△△Ct	2-△△Ct
		si-NC	18.43				22.63
			18.47				22.76
			18.56	18.4867			22.72	22.7033	4.21667	0	1
		si-ABCA1	18.11				23.44
			18.15				23.36
			18.16	18.14			23.32	23.3733	5.23333	1.01667	0.494257
	HuCCT1
		GAPDH				ABCA1			△Ct	△△Ct	2-△△Ct
		si-NC	18.55				22.22
			18.58				22.21
			18.61	18.58			22.23	22.22	3.64	0	1
		si-ABCA1	18.21				23.01
			18.17				22.97
			18.16	18.18			22.89	22.9567	4.77667	1.13667	0.454809
