# Supplementary figures and images for: Regulation of lipid metabolism by APOE4 in intrahepatic cholangiocarcinoma via the enhancement of ABCA1 membrane expression
Source: PeerJ journal article supplement (doi:10.7717/peerj.16740), 2024-01-22

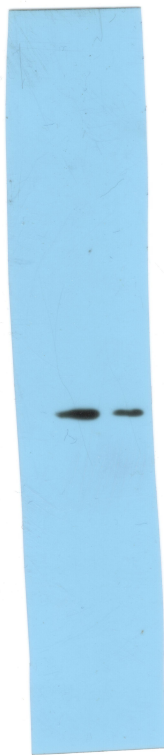

Supplement: WBFig6.zip [file Figure 6B_ABCA1_HuCCT1.pdf › WB-Fugure 6/Figure 6B_ABCA1_HuCCT1.pdf]

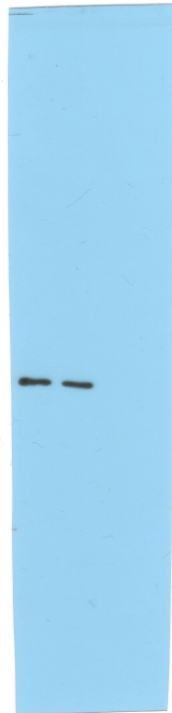

Supplement: WBFig6.zip [file Figure 6B_GAPDH_HuCCT1.pdf › WB-Fugure 6/Figure 6B_GAPDH_HuCCT1.pdf]
